# Supplementary material
Source: PubMed Central journal article supplement (PMC6805110)
Supplement: JB.00336-19-s0001.pdf [file JB.00336-19-s0001.pdf]

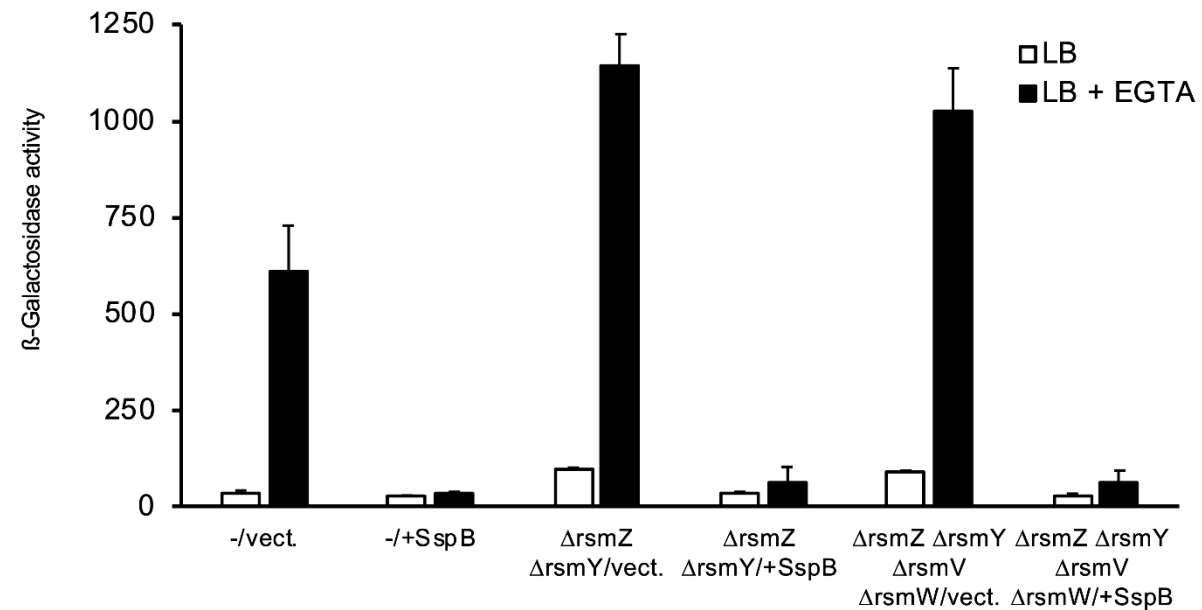

Fig. S1. Deletion of *rsmV* and *rsmW* does not restore T3SS gene expression in the absence of RNase E. T3SS gene expression was assayed using an *exoS* transcription reporter in the presence or absence of calcium. All indicated mutants were generated in PAO1F  $\Delta sspB$  *rne*-VDAS4  $\Delta exoS::GFP-lacZ$ . Where indicated, *sspB* was expressed from a plasmid.  $\beta$ -galactosidase activity is recorded in Miller units and represents an average of three independent experiments with standard deviation.
